# Supplementary material
Source: Springer Nature journal article supplement (https://www.springermedizin.de/resource/supplementary/13054_2011_9780_MOESM2_ESM.pdf/9706924)

2a

## Studies assessing FFP vs any comparator

0% 20% 40% 60% 80% 100%

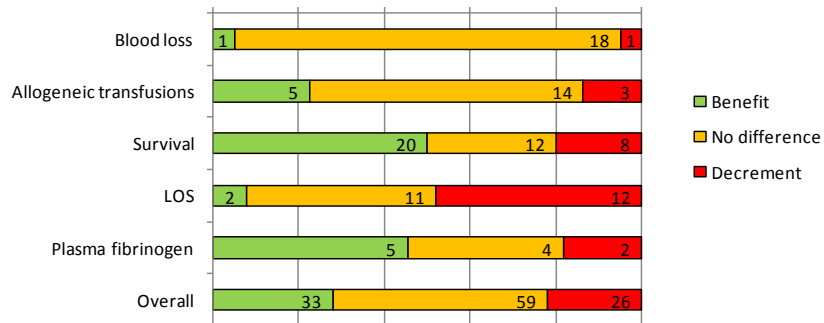

2b

## Studies assessing fibrinogen concentrate vs any comparator

0% 20% 40% 60% 80% 100%

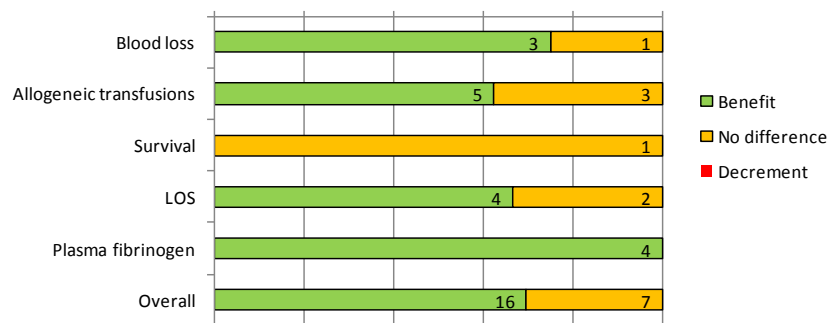

2c

## Studies assessing FFP vs crystalloids/colloids/no FFP

0% 20% 40% 60% 80% 100%

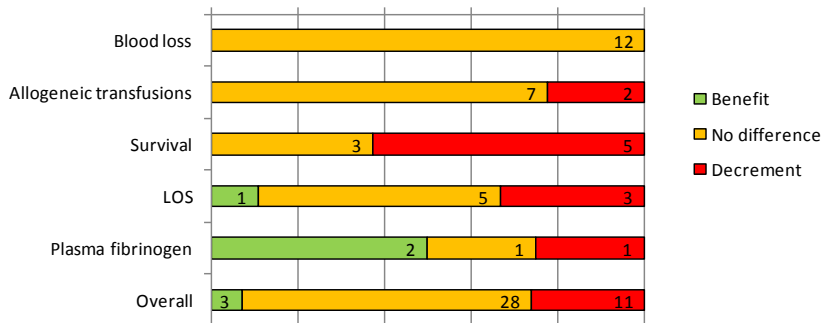

2d

## Studies assessing fibrinogen concentrate vs crystalloids/FFP/no fibrinogen concentrate

0% 20% 40% 60% 80% 100%

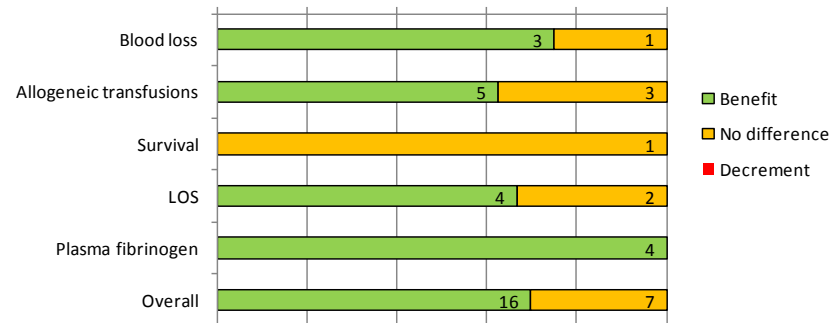

Supplement: MOESM2 [file 9706924]
